# Supplementary material for: Efficacy and Safety of Pemafibrate, a Novel Selective Peroxisome Proliferator-Activated Receptor α Modulator (SPPARMα): Pooled Analysis of Phase 2 and 3 Studies in Dyslipidemic Patients with or without Statin Combination
Source: PubMed Central journal article supplement (PMC6888510; doi:10.3390/ijms20225537), 2019-11-06

Article

# Efficacy and safety of pemafibrate, a novel selective peroxisome proliferator-activated receptor $\alpha$ modulator (SPPARM $\alpha$ ): pooled analysis of phase 2 and 3 studies in dyslipidemic patients with or without statin combination

## Supplementary Materials

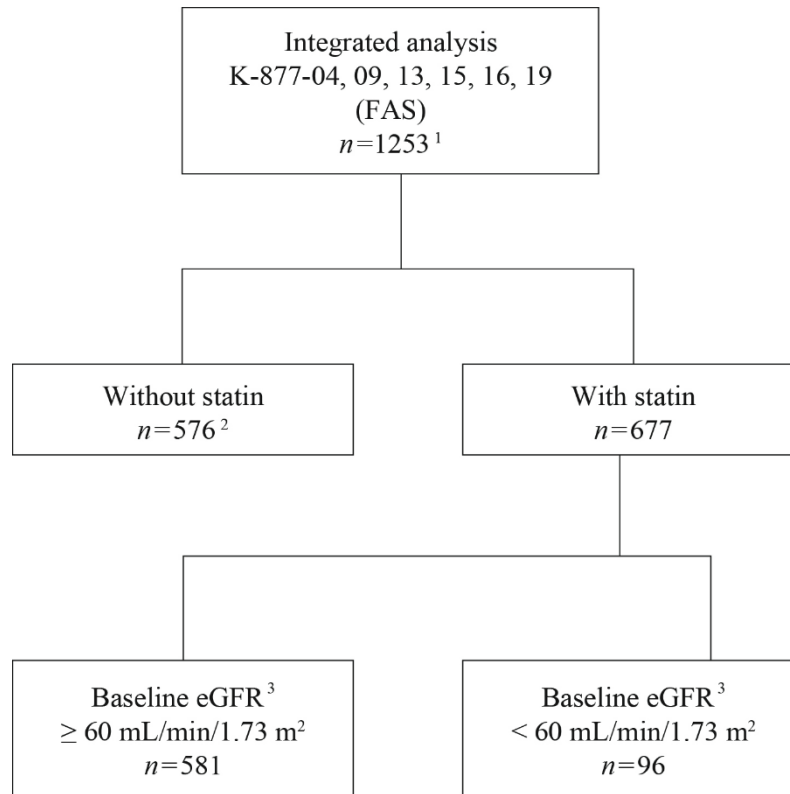

**Figure S1.** Patient population.

<sup>1</sup> Safety analysis set:  $n = 1255$ , <sup>2</sup> Safety analysis set:  $n = 578$ , <sup>3</sup>  $eGFR_{\text{male}} = 194 \times sCr^{-1.094} \times \text{age}^{-0.287}$ ,  $eGFR_{\text{female}} = 194 \times sCr^{-1.094} \times \text{age}^{-0.287} \times 0.739$ . FAS, full analysis set; eGFR, estimated glomerular filtration rate; sCr, serum creatinine.

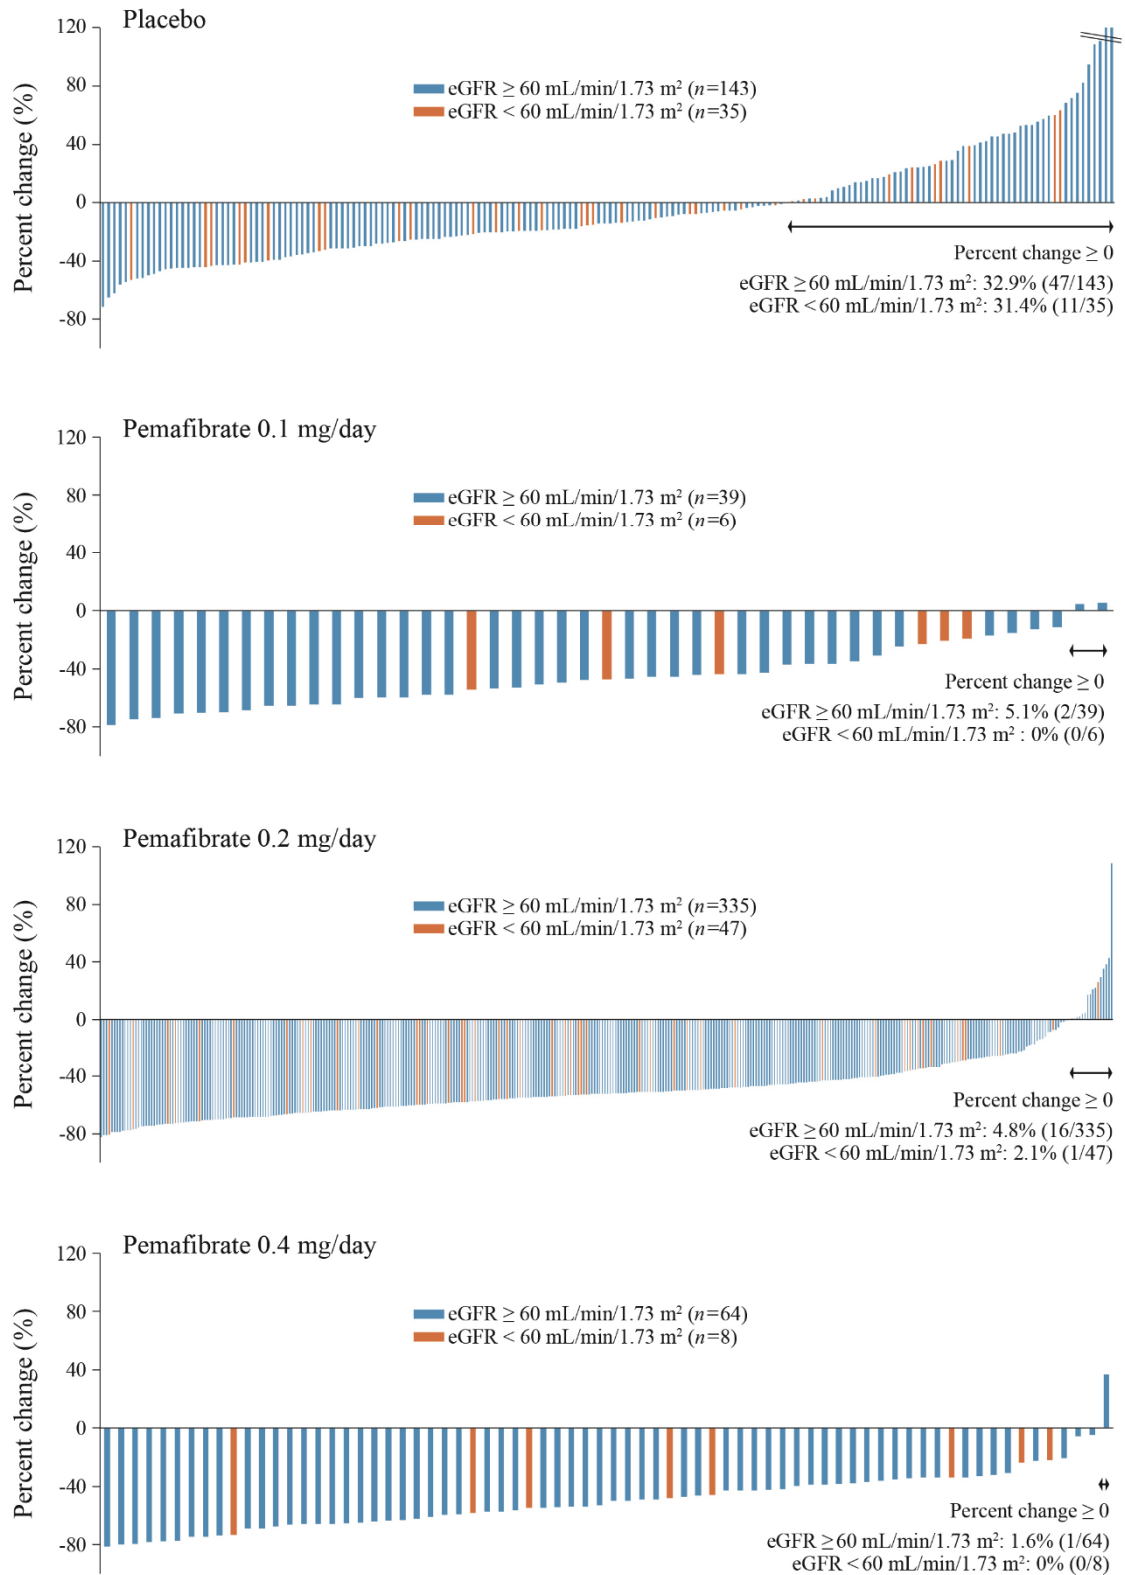

**Figure S2.** Change in TG in patients treated concomitantly with statin from baseline to week 12, stratified by presence or absence of renal dysfunction.

$eGFR_{\text{male}} = 194 \times sCr^{-1.094} \times \text{age}^{-0.287}$ ,  $eGFR_{\text{female}} = 194 \times sCr^{-1.094} \times \text{age}^{-0.287} \times 0.739$ . TG, triglyceride; eGFR, estimated glomerular filtration rate; sCr, serum creatinine.

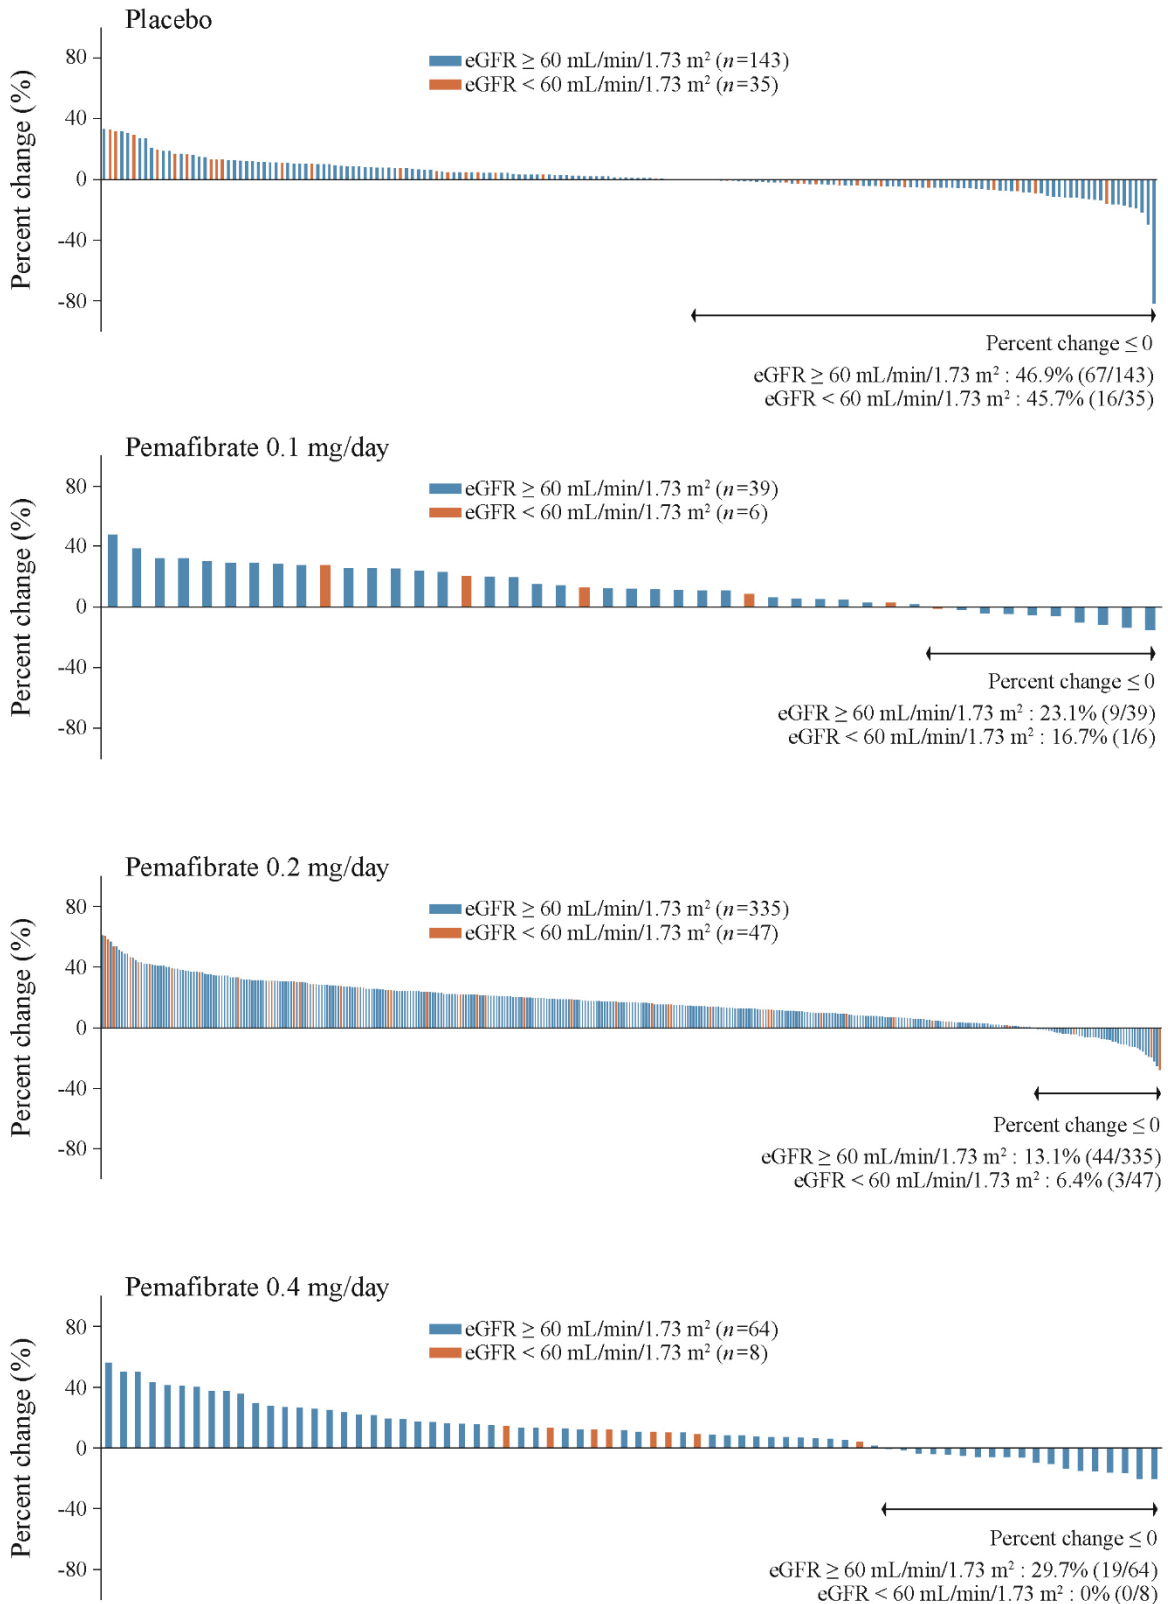

**Figure S3.** Change in HDL-C in patients treated concomitantly with statin from baseline to week 12, stratified by presence or absence of renal dysfunction.

$eGFR_{\text{male}} = 194 \times sCr^{-1.094} \times \text{age}^{-0.287}$ ,  $eGFR_{\text{female}} = 194 \times sCr^{-1.094} \times \text{age}^{-0.287} \times 0.739$ . HDL-C, high-density lipoprotein-cholesterol; eGFR, estimated glomerular filtration rate; sCr, serum creatinine.

**Table S1.** Characteristics of patients at baseline stratified by renal dysfunction (with statin) (FAS).

| Parameter                                      | Baseline eGFR <sup>1</sup> ≥ 60 mL/min/1.73 m <sup>2</sup> |               |                            |               |                            | Baseline eGFR <sup>1</sup> < 60 mL/min/1.73 m <sup>2</sup> |              |                        |              |               |
|------------------------------------------------|------------------------------------------------------------|---------------|----------------------------|---------------|----------------------------|------------------------------------------------------------|--------------|------------------------|--------------|---------------|
|                                                | Placebo                                                    | Pemafibrate   |                            |               | All                        | Placebo                                                    | Pemafibrate  |                        |              | All           |
|                                                |                                                            | 0.1 mg/day    | 0.2 mg/day                 | 0.4 mg/day    |                            |                                                            | 0.1 mg/day   | 0.2 mg/day             | 0.4 mg/day   |               |
| <i>n</i>                                       | 143                                                        | 39            | 335                        | 64            | 581                        | 35                                                         | 6            | 47                     | 8            | 96            |
| Age (years)                                    | 54.8 (10.9)                                                | 54.3 (10.3)   | 55.9 (11.1)                | 54.3 (10.7)   | 55.4 (10.9)                | 65.4 (9.1)                                                 | 59.8 (9.5)   | 64.0 (8.9)             | 66.5 (8.4)   | 64.4 (9.0)    |
| Age ≥65 years                                  | 27 (18.9)                                                  | 5 (12.8)      | 77 (23.0)                  | 9 (14.1)      | 118 (20.3)                 | 17 (48.6)                                                  | 2 (33.3)     | 26 (55.3)              | 4 (50.0)     | 49 (51.0)     |
| Sex, Female                                    | 27 (18.9)                                                  | 8 (20.5)      | 62 (18.5)                  | 10 (15.6)     | 107 (18.4)                 | 11 (31.4)                                                  | 1 (16.7)     | 11 (23.4)              | 4 (50.0)     | 27 (28.1)     |
| Body weight (kg)                               | 75.46 (14.31)                                              | 77.10 (12.67) | 74.75 (14.19) <sub>2</sub> | 74.10 (13.35) | 75.01 (14.02) <sub>3</sub> | 71.78 (12.69)                                              | 67.06 (8.34) | 71.48 (13.54)          | 64.46 (5.48) | 70.73 (12.53) |
| BMI (kg/m <sup>2</sup> )                       | 27.31 (3.79)                                               | 27.77 (3.71)  | 27.25 (4.11) <sup>2</sup>  | 26.45 (3.51)  | 27.21 (3.94) <sup>3</sup>  | 26.87 (3.40)                                               | 24.84 (2.58) | 26.68 (3.21)           | 25.50 (2.74) | 26.54 (3.22)  |
| BMI ≥25 kg/m <sup>2</sup>                      | 98 (68.5)                                                  | 31 (79.5)     | 224 (66.9)                 | 38 (59.4)     | 391 (67.3)                 | 27 (77.1)                                                  | 3 (50.0)     | 33 (70.2)              | 5 (62.5)     | 68 (70.8)     |
| Type 2 diabetes                                | 52 (36.4)                                                  | 13 (33.3)     | 135 (40.3)                 | 31 (48.4)     | 231 (39.8)                 | 20 (57.1)                                                  | 2 (33.3)     | 19 (40.4)              | 8 (100.0)    | 49 (51.0)     |
| Hypertension                                   | 76 (53.1)                                                  | 18 (46.2)     | 215 (64.2)                 | 36 (56.3)     | 345 (59.4)                 | 31 (88.6)                                                  | 2 (33.3)     | 36 (76.6)              | 7 (87.5)     | 76 (79.2)     |
| Fatty liver                                    | 88 (61.5)                                                  | 12 (30.8)     | 205 (61.2)                 | 23 (35.9)     | 328 (56.5)                 | 18 (51.4)                                                  | 1 (16.7)     | 30 (63.8)              | 4 (50.0)     | 53 (55.2)     |
| Pravastatin                                    | 18 (12.6)                                                  | 0             | 45 (13.4)                  | 0             | 63 (10.8)                  | 4 (11.4)                                                   | 0            | 4 (8.5)                | 0            | 8 (8.3)       |
| Simvastatin                                    | 4 (2.8)                                                    | 0             | 7 (2.1)                    | 1 (1.6)       | 12 (2.1)                   | 1 (2.9)                                                    | 0            | 0                      | 0            | 1 (1.0)       |
| Fluvastatin                                    | 3 (2.1)                                                    | 0             | 7 (2.1)                    | 3 (4.7)       | 13 (2.2)                   | 1 (2.9)                                                    | 0            | 1 (2.1)                | 1 (12.5)     | 3 (3.1)       |
| Atorvastatin                                   | 26 (18.2)                                                  | 0             | 66 (19.7)                  | 2 (3.1)       | 94 (16.2)                  | 4 (11.4)                                                   | 0            | 10 (21.3) <sup>4</sup> | 1 (12.5)     | 15 (15.6)     |
| Pitavastatin                                   | 57 (39.9)                                                  | 39 (100)      | 119 (35.5)                 | 53 (82.8)     | 268 (46.1)                 | 16 (45.7)                                                  | 6 (100)      | 15 (31.9)              | 4 (50.0)     | 41 (42.7)     |
| Rosuvastatin                                   | 35 (24.5) <sup>5</sup>                                     | 0             | 91 (27.2)                  | 5 (7.8)       | 131 (22.5)                 | 9 (25.7)                                                   | 0            | 17 (36.2) <sup>4</sup> | 2 (25.0)     | 28 (29.2)     |
| TG (mmol/L)                                    | 3.90 (1.83)                                                | 3.77 (1.38)   | 3.70 (1.56)                | 3.71 (1.36)   | 3.76 (1.60)                | 3.29 (1.06)                                                | 4.56 (1.69)  | 3.56 (1.22)            | 2.88 (1.02)  | 3.47 (1.21)   |
| HDL-C (mmol/L)                                 | 1.19 (0.29)                                                | 1.26 (0.23)   | 1.19 (0.27)                | 1.17 (0.21)   | 1.19 (0.26)                | 1.15 (0.19)                                                | 1.13 (0.16)  | 1.16 (0.20)            | 1.28 (0.28)  | 1.16 (0.20)   |
| LDL-C (mmol/L)                                 | 2.87 (0.79)                                                | 3.22 (0.49)   | 2.85 (0.79)                | 3.10 (0.62)   | 2.91 (0.77)                | 2.97 (0.60)                                                | 3.43 (0.68)  | 2.85 (0.68)            | 3.09 (0.57)  | 2.95 (0.65)   |
| HbA1c (%)                                      | 6.34 (0.78)                                                | 6.31 (0.61)   | 6.44 (0.88)                | 6.54 (0.66)   | 6.42 (0.82)                | 6.63 (0.64)                                                | 6.35 (0.69)  | 6.33 (0.66)            | 7.04 (0.36)  | 6.50 (0.66)   |
| eGFR <sup>1</sup> (mL/min/1.73m <sup>2</sup> ) | 82.2 (15.6)                                                | 82.1 (15.6)   | 81.3 (14.6)                | 81.5 (14.5)   | 81.6 (14.9)                | 52.6 (6.9)                                                 | 53.1 (4.2)   | 52.8 (5.7)             | 50.3 (6.4)   | 52.6 (6.1)    |

Data are presented as mean (standard deviation) for continuous parameters and the number of patients (percentage) for categorical parameters. <sup>1</sup> eGFR<sub>male</sub> = 194 × sCr<sup>-1.094</sup> × age<sup>-0.287</sup>, eGFR<sub>female</sub> = 194 × sCr<sup>-1.094</sup> × age<sup>-0.287</sup> × 0.739, <sup>2</sup> *n* = 334, <sup>3</sup> *n* = 580, <sup>4</sup> one patient switched from atorvastatin to rosuvastatin at week 2, <sup>5</sup> including one patient who started rosuvastatin at week 8. FAS, full analysis set; eGFR, estimated glomerular filtration rate; BMI, body mass index; TG, triglyceride; HDL-C, high-density lipoprotein-cholesterol; LDL-C, low-density lipoprotein-cholesterol; HbA1c, hemoglobin A1c; sCr, serum creatinine.

**Table S2.** Changes in lipoproteins, fibrinogen, and FGF21 from baseline to week 12 (with statin) (FAS).

| Parameter          |                | Baseline eGFR <sup>1</sup> ≥ 60 mL/min/1.73 m <sup>2</sup> |                            | Baseline eGFR <sup>1</sup> < 60 mL/min/1.73 m <sup>2</sup> |                            |
|--------------------|----------------|------------------------------------------------------------|----------------------------|------------------------------------------------------------|----------------------------|
|                    |                | Placebo                                                    | Pemafibrate 0.1–0.4 mg/day | Placebo                                                    | Pemafibrate 0.1–0.4 mg/day |
| TG (mmol/L)        | <i>n</i>       | 143                                                        | 438                        | 35                                                         | 61                         |
|                    | Baseline       | 3.90 (1.83)                                                | 3.71 (1.51)                | 3.29 (1.06)                                                | 3.57 (1.29)                |
|                    | Week 12 (LOCF) | 3.91 (5.22)                                                | 1.85 (1.02)                | 3.03 (1.43)                                                | 1.76 (0.71)                |
|                    | % Change       | -0.3 (-6.2, 5.6)                                           | -48.4 (-51.8, -45.1) ***   | -8.9 (-16.5, -1.4)                                         | -48.0 (-53.7, -42.3) ***   |
| HDL-C (mmol/L)     | <i>n</i>       | 143                                                        | 438                        | 35                                                         | 61                         |
|                    | Baseline       | 1.19 (0.29)                                                | 1.19 (0.26)                | 1.15 (0.19)                                                | 1.17 (0.21)                |
|                    | Week 12 (LOCF) | 1.20 (0.31)                                                | 1.37 (0.32)                | 1.20 (0.19)                                                | 1.38 (0.30)                |
|                    | % Change       | 1.0 (-1.4, 3.4)                                            | 15.2 (13.8, 16.5) ***      | 4.8 (-0.1, 9.6)                                            | 18.3 (14.6, 22.0) ***      |
| LDL-C (mmol/L)     | <i>n</i>       | 143                                                        | 438                        | 35                                                         | 61                         |
|                    | Baseline       | 2.87 (0.79)                                                | 2.92 (0.76)                | 2.97 (0.60)                                                | 2.94 (0.69)                |
|                    | Week 12 (LOCF) | 2.77 (0.81)                                                | 3.03 (0.74)                | 3.03 (0.67)                                                | 3.06 (0.89)                |
|                    | % Change       | -3.2 (-7.1, 0.7)                                           | 8.5 (6.2, 10.7) **         | 3.5 (-4.2, 11.2)                                           | 6.6 (0.8, 12.5)            |
| Non-HDL-C (mmol/L) | <i>n</i>       | 143                                                        | 438                        | 35                                                         | 61                         |
|                    | Baseline       | 4.05 (0.73)                                                | 4.06 (0.73)                | 4.03 (0.60)                                                | 4.11 (0.70)                |
|                    | Week 12 (LOCF) | 3.93 (1.46)                                                | 3.68 (0.81)                | 3.98 (0.68)                                                | 3.70 (0.96)                |
|                    | % Change       | -2.9 (-6.1, 0.3)                                           | -8.6 (-10.4, -6.7) **      | -0.8 (-6.2, 4.7)                                           | -9.7 (-13.8, -5.6) *       |
| TC (mmol/L)        | <i>n</i>       | 143                                                        | 438                        | 35                                                         | 61                         |
|                    | Baseline       | 5.24 (0.80)                                                | 5.26 (0.78)                | 5.18 (0.65)                                                | 5.28 (0.73)                |
|                    | Week 12 (LOCF) | 5.12 (1.42)                                                | 5.05 (0.78)                | 5.18 (0.70)                                                | 5.07 (0.96)                |
|                    | % Change       | -2.1 (-4.4, 0.3)                                           | -3.2 (-4.6, -1.8)          | 0.3 (-4.0, 4.6)                                            | -3.5 (-6.7, -0.2)          |
| RemL-C (mmol/L)    | <i>n</i>       | 36                                                         | 130                        | 8                                                          | 10                         |
|                    | Baseline       | 0.69 (0.40)                                                | 0.63 (0.39)                | 0.50 (0.24)                                                | 0.92 (0.68)                |
|                    | Week 12 (LOCF) | 0.63 (0.31)                                                | 0.28 (0.21)                | 0.56 (0.34)                                                | 0.39 (0.29)                |
|                    | % Change       | 12.9 (-0.7, 26.5)                                          | -47.7 (-54.9, -40.6) ***   | 21.5 (-30.5, 73.4)                                         | -45.2 (-91.3, 0.8)         |
| ApoAI (mg/dL)      | <i>n</i>       | 123                                                        | 400                        | 25                                                         | 52                         |
|                    | Baseline       | 139.7 (22.6)                                               | 137.4 (21.0)               | 132.1 (16.9)                                               | 134.4 (15.0)               |
|                    | Week 12 (LOCF) | 137.3 (23.3)                                               | 142.3 (19.6)               | 135.2 (14.9)                                               | 143.9 (17.9)               |
|                    | % Change       | -1.3 (-2.8, 0.2)                                           | 4.0 (3.2, 4.8) ***         | 2.5 (-1.2, 6.3)                                            | 7.7 (5.1, 10.3) *          |
| ApoAII (mg/dL)     | <i>n</i>       | 123                                                        | 400                        | 25                                                         | 52                         |
|                    | Baseline       | 32.4 (4.9)                                                 | 32.3 (4.9)                 | 29.9 (3.3)                                                 | 30.4 (4.6)                 |
|                    | Week 12 (LOCF) | 32.1 (5.4)                                                 | 40.3 (7.3)                 | 30.7 (3.2)                                                 | 40.0 (7.5)                 |
|                    | % Change       | -0.9 (-3.5, 1.8)                                           | 25.5 (24.0, 27.0) ***      | 2.7 (-4.2, 9.6)                                            | 32.5 (27.7, 37.2) ***      |
| ApoB (mg/dL)       | <i>n</i>       | 123                                                        | 400                        | 25                                                         | 52                         |
|                    | Baseline       | 98.7 (18.4)                                                | 97.8 (18.0)                | 98.8 (15.5)                                                | 98.0 (19.8)                |

|                    |                |                       |                         |                       |                         |
|--------------------|----------------|-----------------------|-------------------------|-----------------------|-------------------------|
|                    | Week 12 (LOCF) | 93.2 (16.9)           | 91.1 (18.7)             | 98.0 (14.7)           | 90.1 (21.7)             |
|                    | % Change       | -4.5 (-7.3, -1.8)     | -5.6 (-7.2, -4.1)       | 0.3 (-5.7, 6.2)       | -7.4 (-11.5, -3.2)*     |
| ApoB48 (µg/mL)     | <i>n</i>       | 38                    | 131                     | 8                     | 10                      |
|                    | Baseline       | 14.1 (10.5)           | 11.1 (6.7)              | 13.2 (9.1)            | 21.8 (28.1)             |
|                    | Week 12 (LOCF) | 14.4 (16.5)           | 4.6 (3.5)               | 13.2 (8.3)            | 8.2 (7.0)               |
|                    | % Change       | 23.3 (8.6, 37.9)      | -54.2 (-62.1, -46.4)*** | 48.2 (-49.1, 145.5)   | -46.6 (-133.4, 40.2)    |
| ApoB100 (mg/dL)    | <i>n</i>       | 36                    | 130                     | 8                     | 10                      |
|                    | Baseline       | 103.3 (18.3)          | 103.9 (14.6)            | 100.3 (14.7)          | 103.3 (21.4)            |
|                    | Week 12 (LOCF) | 97.9 (17.1)           | 94.7 (18.0)             | 102.2 (16.6)          | 101.2 (30.3)            |
|                    | % Change       | -4.8 (-9.9, 0.2)      | -7.9 (-10.6, -5.3)      | 2.6 (-6.9, 12.1)      | -3.1 (-11.6, 5.4)       |
| ApoCII (mg/dL)     | <i>n</i>       | 123                   | 400                     | 25                    | 52                      |
|                    | Baseline       | 8.1 (2.6)             | 8.2 (2.5)               | 8.1 (2.4)             | 8.4 (2.1)               |
|                    | Week 12 (LOCF) | 7.8 (2.1)             | 6.4 (2.3)               | 8.4 (2.8)             | 6.4 (1.6)               |
|                    | % Change       | -1.2 (-5.1, 2.6)      | -20.4 (-22.6, -18.3)*** | 4.7 (-3.3, 12.6)      | -21.6 (-27.1, -16.1)*** |
| ApoCIII (mg/dL)    | <i>n</i>       | 123                   | 400                     | 25                    | 52                      |
|                    | Baseline       | 17.7 (6.4)            | 17.3 (5.7)              | 17.4 (6.6)            | 17.3 (5.5)              |
|                    | Week 12 (LOCF) | 16.8 (5.7)            | 11.2 (4.1)              | 17.6 (6.2)            | 11.3 (4.2)              |
|                    | % Change       | -1.1 (-4.8, 2.6)      | -32.9 (-35.0, -30.9)*** | 3.7 (-4.3, 11.6)      | -32.8 (-38.3, -27.3)*** |
| ApoCIII/ApoCII     | <i>n</i>       | 123                   | 400                     | 25                    | 52                      |
|                    | Baseline       | 2.2 (0.4)             | 2.1 (0.5)               | 2.2 (0.6)             | 2.1 (0.4)               |
|                    | Week 12 (LOCF) | 2.2 (0.5)             | 1.8 (0.5)               | 2.2 (0.5)             | 1.8 (0.4)               |
|                    | % Change       | 0.4 (-2.5, 3.2)       | -14.4 (-16.0, -12.8)*** | 2.0 (-5.0, 8.9)       | -13.9 (-18.7, -9.1)***  |
| ApoE (mg/dL)       | <i>n</i>       | 123                   | 400                     | 25                    | 52                      |
|                    | Baseline       | 5.5 (2.1)             | 5.3 (1.8)               | 4.9 (1.3)             | 5.1 (1.4)               |
|                    | Week 12 (LOCF) | 5.2 (1.7)             | 4.0 (1.0)               | 5.2 (1.4)             | 4.0 (0.7)               |
|                    | % Change       | 0.1 (-3.3, 3.6)       | -19.2 (-21.2, -17.3)*** | 5.8 (-0.3, 11.9)      | -18.5 (-22.7, -14.3)*** |
| Fibrinogen (mg/dL) | <i>n</i>       | 142                   | 437                     | 35                    | 61                      |
|                    | Baseline       | 282.4 (46.9)          | 283.6 (50.4)            | 299.8 (55.4)          | 308.3 (62.5)            |
|                    | Week 12 (LOCF) | 284.4 (48.8)          | 239.3 (48.8)            | 307.0 (52.2)          | 253.7 (76.8)            |
|                    | Change         | 1.6 (-4.9, 8.2)       | -44.2 (-47.9, -40.4)*** | 4.1 (-17.5, 25.7)     | -52.9 (-69.2, -36.5)*** |
| FGF21 (pg/mL)      | <i>n</i>       | 38                    | 131                     | 8                     | 10                      |
|                    | Baseline       | 617.0 (956.2)         | 502.4 (902.2)           | 529.3 (301.6)         | 622.7 (173.3)           |
|                    | Week 12 (LOCF) | 465.0 (230.2)         | 831.0 (1290.8)          | 541.7 (396.0)         | 1419.6 (987.3)          |
|                    | Change         | -155.7 (-359.3, 47.8) | 329.7 (220.1, 439.2)*** | -28.6 (-645.9, 588.6) | 829.7 (278.9, 1380.5)*  |

Data are presented as mean (standard deviation) for baseline and week 12 (LOCF), and least square means (95% confidence interval) for % change or change. \*  $p < 0.05$ , \*\*  $p < 0.01$ , \*\*\*  $p < 0.001$  vs. placebo by ANCOVA with baseline as covariant. <sup>1</sup>  $eGFR_{\text{male}} = 194 \times sCr^{-1.094} \times \text{age}^{-0.287}$ ,  $eGFR_{\text{female}} = 194 \times sCr^{-1.094} \times \text{age}^{-0.287} \times 0.739$ . FAS, full analysis set; eGFR, estimated glomerular filtration rate; TG, triglyceride; HDL-C, high-density lipoprotein-cholesterol; LDL-C, low-density lipoprotein-

cholesterol; TC, total cholesterol; RemL-C, remnant lipoprotein-cholesterol; Apo, apolipoprotein; FGF, fibroblast growth factor; LOCF, last observation carried forward; sCr, serum creatinine.

**Table S3.** Changes in lipoproteins from baseline to week 12 (with statin) (FAS).

| Parameter                    |                | Baseline eGFR <sup>1</sup> ≥ 60 mL/min/1.73 m <sup>2</sup> |                            | Baseline eGFR <sup>1</sup> < 60 mL/min/1.73 m <sup>2</sup> |                            |
|------------------------------|----------------|------------------------------------------------------------|----------------------------|------------------------------------------------------------|----------------------------|
|                              |                | Placebo                                                    | Pemafibrate 0.1–0.4 mg/day | Placebo                                                    | Pemafibrate 0.1–0.4 mg/day |
| CM-C<br>(mmol/L)             | <i>n</i>       | 141                                                        | 428                        | 33                                                         | 58                         |
|                              | Baseline       | 0.216 (0.217)                                              | 0.198 (0.176)              | 0.149 (0.105)                                              | 0.209 (0.186)              |
|                              | Week 12 (LOCF) | 0.185 (0.276)                                              | 0.053 (0.067)              | 0.128 (0.106)                                              | 0.049 (0.049)              |
|                              | % Change       | 29.9 (15.7, 44.2)                                          | -62.3 (-70.5, -54.1)***    | -0.8 (-18.3, 16.6)                                         | -65.9 (-79.0, -52.8)***    |
| VLDL-C<br>(mmol/L)           | <i>n</i>       | 141                                                        | 428                        | 33                                                         | 58                         |
|                              | Baseline       | 1.312 (0.400)                                              | 1.312 (0.377)              | 1.327 (0.355)                                              | 1.397 (0.394)              |
|                              | Week 12 (LOCF) | 1.260 (0.447)                                              | 0.918 (0.306)              | 1.316 (0.380)                                              | 0.968 (0.348)              |
|                              | % Change       | -0.8 (-4.4, 2.9)                                           | -27.4 (-29.5, -25.3)***    | 0.5 (-6.4, 7.4)                                            | -29.2 (-34.4, -24.0)***    |
| Large LDL-C<br>(mmol/L)      | <i>n</i>       | 141                                                        | 428                        | 33                                                         | 58                         |
|                              | Baseline       | 0.487 (0.157)                                              | 0.494 (0.157)              | 0.503 (0.117)                                              | 0.485 (0.146)              |
|                              | Week 12 (LOCF) | 0.491 (0.160)                                              | 0.701 (0.184)              | 0.534 (0.164)                                              | 0.704 (0.177)              |
|                              | % Change       | 3.3 (-2.4, 9.1)                                            | 50.7 (47.4, 54.0)***       | 8.9 (-3.3, 21.2)                                           | 53.8 (44.6, 63.1)***       |
| Medium LDL-C<br>(mmol/L)     | <i>n</i>       | 141                                                        | 428                        | 33                                                         | 58                         |
|                              | Baseline       | 0.970 (0.285)                                              | 0.975 (0.281)              | 0.994 (0.251)                                              | 0.957 (0.285)              |
|                              | Week 12 (LOCF) | 0.954 (0.280)                                              | 1.128 (0.268)              | 1.018 (0.255)                                              | 1.136 (0.322)              |
|                              | % Change       | -0.2 (-5.1, 4.7)                                           | 23.2 (20.4, 26.0)***       | 5.9 (-4.4, 16.3)                                           | 24.9 (17.1, 32.7)**        |
| Small LDL-C<br>(mmol/L)      | <i>n</i>       | 141                                                        | 428                        | 33                                                         | 58                         |
|                              | Baseline       | 0.641 (0.191)                                              | 0.644 (0.182)              | 0.643 (0.147)                                              | 0.644 (0.189)              |
|                              | Week 12 (LOCF) | 0.618 (0.177)                                              | 0.576 (0.170)              | 0.640 (0.154)                                              | 0.577 (0.203)              |
|                              | % Change       | -1.8 (-6.1, 2.5)                                           | -6.0 (-8.5, -3.5)          | 1.5 (-6.7, 9.7)                                            | -7.8 (-14.0, -1.7)         |
| Very small LDL-C<br>(mmol/L) | <i>n</i>       | 141                                                        | 428                        | 33                                                         | 58                         |
|                              | Baseline       | 0.269 (0.082)                                              | 0.275 (0.081)              | 0.272 (0.083)                                              | 0.274 (0.081)              |
|                              | Week 12 (LOCF) | 0.258 (0.072)                                              | 0.231 (0.070)              | 0.272 (0.094)                                              | 0.229 (0.084)              |
|                              | % Change       | -2.2 (-5.9, 1.6)                                           | -12.5 (-14.7, -10.4)***    | 1.4 (-6.2, 8.9)                                            | -14.6 (-20.3, -8.9)**      |
| Very large HDL-C<br>(mmol/L) | <i>n</i>       | 141                                                        | 428                        | 33                                                         | 58                         |
|                              | Baseline       | 0.055 (0.017)                                              | 0.056 (0.018)              | 0.054 (0.017)                                              | 0.056 (0.016)              |
|                              | Week 12 (LOCF) | 0.053 (0.017)                                              | 0.053 (0.017)              | 0.057 (0.017)                                              | 0.053 (0.019)              |
|                              | % Change       | -1.8 (-4.8, 1.2)                                           | -3.2 (-5.0, -1.5)          | 7.2 (1.0, 13.5)                                            | -4.3 (-9.0, 0.4)**         |
| Large HDL-C<br>(mmol/L)      | <i>n</i>       | 141                                                        | 428                        | 33                                                         | 58                         |
|                              | Baseline       | 0.146 (0.076)                                              | 0.150 (0.078)              | 0.138 (0.066)                                              | 0.148 (0.074)              |
|                              | Week 12 (LOCF) | 0.145 (0.075)                                              | 0.135 (0.083)              | 0.152 (0.069)                                              | 0.132 (0.084)              |

|                              |                |                 |                       |                  |                       |
|------------------------------|----------------|-----------------|-----------------------|------------------|-----------------------|
| Medium HDL-C<br>(mmol/L)     | % Change       | 2.1 (-2.6, 6.8) | -9.7 (-12.4, -7.0)*** | 12.1 (1.5, 22.7) | -10.3 (-18.3, -2.3)** |
|                              | <i>n</i>       | 141             | 428                   | 33               | 58                    |
|                              | Baseline       | 0.366 (0.109)   | 0.366 (0.104)         | 0.338 (0.077)    | 0.343 (0.092)         |
| Small HDL-C<br>(mmol/L)      | Week 12 (LOCF) | 0.366 (0.114)   | 0.435 (0.135)         | 0.349 (0.068)    | 0.429 (0.126)         |
|                              | % Change       | 0.8 (-2.6, 4.2) | 19.9 (17.9, 21.8)***  | 4.6 (-3.3, 12.4) | 26.8 (20.8, 32.7)***  |
|                              | <i>n</i>       | 141             | 428                   | 33               | 58                    |
| Very small HDL-C<br>(mmol/L) | Baseline       | 0.380 (0.079)   | 0.376 (0.073)         | 0.363 (0.066)    | 0.365 (0.065)         |
|                              | Week 12 (LOCF) | 0.380 (0.078)   | 0.470 (0.083)         | 0.365 (0.061)    | 0.484 (0.080)         |
|                              | % Change       | 1.3 (-1.5, 4.1) | 26.7 (25.1, 28.3)***  | 1.3 (-5.0, 7.5)  | 34.9 (30.1, 39.6)***  |
|                              | <i>n</i>       | 141             | 428                   | 33               | 58                    |
|                              | Baseline       | 0.171 (0.035)   | 0.174 (0.034)         | 0.170 (0.043)    | 0.170 (0.036)         |
|                              | Week 12 (LOCF) | 0.172 (0.036)   | 0.204 (0.038)         | 0.172 (0.042)    | 0.208 (0.037)         |
|                              | % Change       | 1.1 (-1.9, 4.1) | 19.4 (17.7, 21.1)***  | 2.5 (-3.9, 8.9)  | 25.2 (20.4, 30.0)***  |

Data are presented as mean (standard deviation) for baseline and week 12 (LOCF), and least square means (95% confidence interval) for % change or change. \*  $p < 0.05$ , \*\*  $p < 0.01$ , \*\*\*  $p < 0.001$  vs. placebo by ANCOVA with baseline as covariant. <sup>1</sup>  $eGFR_{\text{male}} = 194 \times sCr^{-1.094} \times \text{age}^{-0.287}$ ,  $eGFR_{\text{female}} = 194 \times sCr^{-1.094} \times \text{age}^{-0.287} \times 0.739$ . HPLC, high-performance liquid chromatography; FAS, full analysis set; eGFR, estimated glomerular filtration rate; CM-C, chylomicron-cholesterol; VLDL-C, very-low-density lipoprotein-cholesterol; LDL-C, low-density lipoprotein-cholesterol; HDL-C, high-density lipoprotein-cholesterol; LOCF, last observation carried forward; sCr, serum creatinine.

**Table S4.** Changes in safety parameters with concomitant statin treatment from baseline to week 12 (SAS).

| Parameter                                          |          | Baseline eGFR <sup>1</sup> ≥ 60 mL/min/1.73 m <sup>2</sup> |                            | Baseline eGFR <sup>1</sup> < 60 mL/min/1.73 m <sup>2</sup> |                            |
|----------------------------------------------------|----------|------------------------------------------------------------|----------------------------|------------------------------------------------------------|----------------------------|
|                                                    |          | Placebo                                                    | Pemafibrate 0.1–0.4 mg/day | Placebo                                                    | Pemafibrate 0.1–0.4 mg/day |
| sCr (mg/dL)                                        | <i>n</i> | 141                                                        | 425                        | 33                                                         | 58                         |
|                                                    | Baseline | 0.75 (0.14)                                                | 0.76 (0.13)                | 1.03 (0.18)                                                | 1.05 (0.16)                |
|                                                    | Week 12  | 0.76 (0.14)                                                | 0.79 (0.15)                | 1.01 (0.19)                                                | 1.06 (0.19)                |
|                                                    | Change   | 0.00 (-0.01, 0.01)                                         | 0.03 (0.02, 0.03)***       | -0.02 (-0.05, 0.01)                                        | 0.01 (-0.02, 0.03)         |
| eGFR <sup>1</sup><br>(mL/min/1.73 m <sup>2</sup> ) | <i>n</i> | 141                                                        | 425                        | 33                                                         | 58                         |
|                                                    | Baseline | 82.4 (15.6)                                                | 81.4 (14.6)                | 52.7 (7.1)                                                 | 52.8 (5.5)                 |
|                                                    | Week 12  | 82.1 (15.5)                                                | 78.6 (14.7)                | 54.3 (9.1)                                                 | 52.8 (7.0)                 |
|                                                    | Change   | -0.2 (-1.3, 1.0)                                           | -2.8 (-3.5, -2.2)***       | 1.6 (-0.3, 3.5)                                            | 0.0 (-1.4, 1.4)            |
| CK (U/L)                                           | <i>n</i> | 141                                                        | 425                        | 33                                                         | 58                         |
|                                                    | Baseline | 136.7 (73.9)                                               | 135.6 (103.8)              | 181.8 (253.4)                                              | 133.0 (81.0)               |
|                                                    | Week 12  | 129.3 (62.3)                                               | 143.9 (128.1)              | 127.3 (46.3)                                               | 141.5 (77.0)               |
|                                                    | Change   | -6.8 (-24.8, 11.1)                                         | 8.1 (-2.2, 18.5)           | -26.9 (-49.6, -4.1)                                        | -7.2 (-24.3, 9.9)          |
| AST (U/L)                                          | <i>n</i> | 136                                                        | 418                        | 33                                                         | 58                         |
|                                                    | Baseline | 31.5 (10.3)                                                | 31.9 (14.1)                | 30.0 (8.5)                                                 | 28.5 (12.2)                |
|                                                    | Week 12  | 32.6 (12.1)                                                | 30.7 (11.8)                | 27.6 (7.4)                                                 | 30.6 (17.5)                |



|                         |          |                    |                          |                    |                          |
|-------------------------|----------|--------------------|--------------------------|--------------------|--------------------------|
| ALT (U/L)               | Change   | 0.9 (-0.7, 2.5)    | -1.2 (-2.1, -0.2) *      | -2.5 (-5.5, 0.4)   | 2.2 (-0.1, 4.4) *        |
|                         | <i>n</i> | 141                | 425                      | 33                 | 58                       |
|                         | Baseline | 39.7 (18.6)        | 39.3 (21.1)              | 32.5 (13.9)        | 31.0 (15.1)              |
| $\gamma$ -GT (U/L)      | Week 12  | 41.3 (21.8)        | 30.3 (19.1)              | 29.0 (11.5)        | 26.2 (15.3)              |
|                         | Change   | 1.7 (-0.8, 4.1)    | -9.0 (-10.5, -7.6) ***   | -3.2 (-6.4, 0.1)   | -5.0 (-7.5, -2.5)        |
|                         | <i>n</i> | 141                | 425                      | 33                 | 58                       |
| ALP (U/L)               | Baseline | 92.3 (97.8)        | 84.2 (81.7)              | 52.4 (36.2)        | 58.3 (38.2)              |
|                         | Week 12  | 97.8 (114.1)       | 45.3 (44.6)              | 51.4 (38.1)        | 36.3 (37.3)              |
|                         | Change   | 7.8 (0.8, 14.7)    | -39.6 (-43.6, -35.6) *** | -2.2 (-11.6, 7.3)  | -21.3 (-28.4, -14.3) **  |
| Total bilirubin (mg/dL) | <i>n</i> | 141                | 425                      | 33                 | 58                       |
|                         | Baseline | 230.3 (60.3)       | 237.1 (67.7)             | 238.4 (66.6)       | 246.5 (79.8)             |
|                         | Week 12  | 229.4 (62.6)       | 160.8 (52.7)             | 231.8 (62.5)       | 165.1 (53.8)             |
| Total bilirubin (mg/dL) | Change   | -2.5 (-7.7, 2.7)   | -75.8 (-78.8, -72.7) *** | -8.5 (-18.9, 2.0)  | -80.3 (-88.2, -72.5) *** |
|                         | <i>n</i> | 141                | 425                      | 33                 | 58                       |
|                         | Baseline | 0.78 (0.37)        | 0.77 (0.33)              | 0.74 (0.34)        | 0.70 (0.22)              |
| Total bilirubin (mg/dL) | Week 12  | 0.80 (0.32)        | 0.64 (0.22)              | 0.74 (0.30)        | 0.61 (0.16)              |
|                         | Change   | 0.02 (-0.01, 0.05) | -0.13 (-0.15, -0.11) *** | 0.01 (-0.04, 0.07) | -0.10 (-0.14, -0.06) **  |

Data are presented as mean (standard deviation) for baseline and week 12, and least square means (95% confidence interval) for % change or change. \*  $p < 0.05$ , \*\*  $p < 0.01$ , \*\*\*  $p < 0.001$  vs. placebo by ANCOVA with baseline as covariant. <sup>1</sup>  $eGFR_{\text{male}} = 194 \times sCr^{-1.094} \times \text{age}^{-0.287}$ ,  $eGFR_{\text{female}} = 194 \times sCr^{-1.094} \times \text{age}^{-0.287} \times 0.739$ . SAS, safety analysis set; eGFR, estimated glomerular filtration rate; sCr, serum creatinine; CK, creatine kinase; AST, aspartate aminotransferase; ALT, alanine aminotransferase;  $\gamma$ -GT, gamma-glutamyltransferase; ALP, alkaline phosphatase.

**Table S5.** Summary of six placebo-controlled, double-blind, randomized trials of pemafibrate.

| Study No.                           | Dose                                                                            | Inclusion criteria regarding lipid parameters                                                                             | Primary outcomes                                                                   | n <sup>1</sup> | Duration    | Reference                                                          |
|-------------------------------------|---------------------------------------------------------------------------------|---------------------------------------------------------------------------------------------------------------------------|------------------------------------------------------------------------------------|----------------|-------------|--------------------------------------------------------------------|
| K-877-04<br>Dose finding            | Placebo<br>Pemafibrate 0.05, 0.1, 0.2, or 0.4 mg/day<br>Fenofibrate 100 mg/day  | TG: 2.26-5.65 mmol/L (200–500 mg/dL)<br>HDL-C:<br>< 1.29 mmol/L (50 mg/dL) (Male),<br>< 1.42 mmol/L (55 mg/dL) (Female)   | Efficacy: Percent change in fasting TG<br>Safety: Incidence of AEs and ADRs        | 224            | 12 weeks    | Ishibashi S, et al. <i>Atherosclerosis</i> . 2016; 249:36–43.      |
| K-877-09<br>Compared to fenofibrate | Placebo<br>Pemafibrate 0.1, 0.2, or 0.4 mg/day<br>Fenofibrate 100 or 200 mg/day | TG: 2.26-11.29 mmol/L (200–1000 mg/dL)<br>HDL-C:<br>< 1.29 mmol/L (50 mg/dL) (Male),<br>< 1.42 mmol/L (55 mg/dL) (Female) | Efficacy: Percent change in fasting TG<br>Safety: Incidence of AEs and ADRs        | 526            | 12 weeks    | Arai H, et al. <i>J Atheroscler Thromb</i> . 2018; 25: 521-538.    |
| K-877-13<br>Add-on to pitavastatin  | Placebo<br>Pemafibrate 0.1, 0.2, or 0.4 mg/day                                  | TG: 2.26-11.29 mmol/L (200-1000 mg/dL)<br>Non-HDL-C: ≥ 3.88 mmol/L (150 mg/dL)                                            | Efficacy: Percent change in fasting TG<br>Safety: Incidence of AEs and ADRs        | 188            | 12 weeks    | Arai H, et al. <i>Atherosclerosis</i> . 2017; 261:144–152.         |
| K-877-15<br>Add-on to any statin    | Placebo<br>Pemafibrate 0.2 or 0.2 (0.4) <sup>2</sup> mg/day                     | TG: 2.26-11.29 mmol/L (200–1000 mg/dL)                                                                                    | Efficacy: Percent change in fasting TG<br>Safety: Incidence of AEs and ADRs        | 423            | 24 weeks    | Arai H, et al. <i>Atherosclerosis</i> . 2017; 261:144–152.         |
| K-877-16<br>Type 2 diabetes         | Placebo <sup>3</sup><br>Pemafibrate 0.2 or 0.4 mg/day                           | TG: 1.69-11.29 mmol/L (150–1000 mg/dL)                                                                                    | Efficacy: Percent change in fasting TG<br>Safety: Incidence of AEs and ADRs        | 166            | 24-52 weeks | Araki E, et al. <i>Diabetes Care</i> . 2018;41:538-546.            |
| K-877-19<br>Glucose clamp           | Placebo<br>Pemafibrate 0.4 mg/day                                               | TG: 2.26-5.65 mmol/L (200–500 mg/dL)                                                                                      | Efficacy: Change in splanchnic glucose uptake<br>Safety: Incidence of AEs and ADRs | 27             | 12 weeks    | Matsuba I, et al. <i>J Diabetes Investig</i> . 2018; 9: 1323–1332. |

<sup>1</sup> the number of randomized patients, <sup>2</sup> up-titrating from pemafibrate 0.2 mg/day to 0.4 mg/day after week 12 if TG levels ≥ 1.69 mmol/L (150 mg/dL) at week 8, <sup>3</sup> switching from placebo to pemafibrate 0.2 mg/day after week 24. TG, triglyceride; HDL-C, high-density lipoprotein-cholesterol; AEs, adverse events; ADRs, adverse drug reactions.

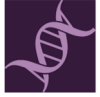

Supplement: ijms-20-05537-s001.pdf [file ijms-20-05537-s001.pdf]
